# Supplementary material for: Assembly-Driven Community Genomics of a Hypersaline Microbial Ecosystem
Source: PubMed Central journal article supplement (PMC3630111; doi:10.1371/journal.pone.0061692), 2013-04-18
Supplement: pone.0061692.s001.pdf [file pone.0061692.s001.pdf]

**Supporting Table S1.** Water chemistry of Lake Tyrrell sampling site, located at 35°19' 12.24S 142°48' 00.45E.

| <b>collection date</b> | <b>water temp (°C)</b> | <b>Salinity (ppt)</b> | <b>TDS (wt%)</b> | <b>pH</b> |
|------------------------|------------------------|-----------------------|------------------|-----------|
| 1/23/07                | 22                     | 127                   | 31               | 7.23      |
| 1/25/07                | 28                     | 132                   | 31               | 7.09      |
