# Supplementary material for: Assembly-Driven Community Genomics of a Hypersaline Microbial Ecosystem
Source: PubMed Central journal article supplement (PMC3630111; doi:10.1371/journal.pone.0061692), 2013-04-18
Supplement: pone.0061692.s010.pdf [file pone.0061692.s010.pdf]

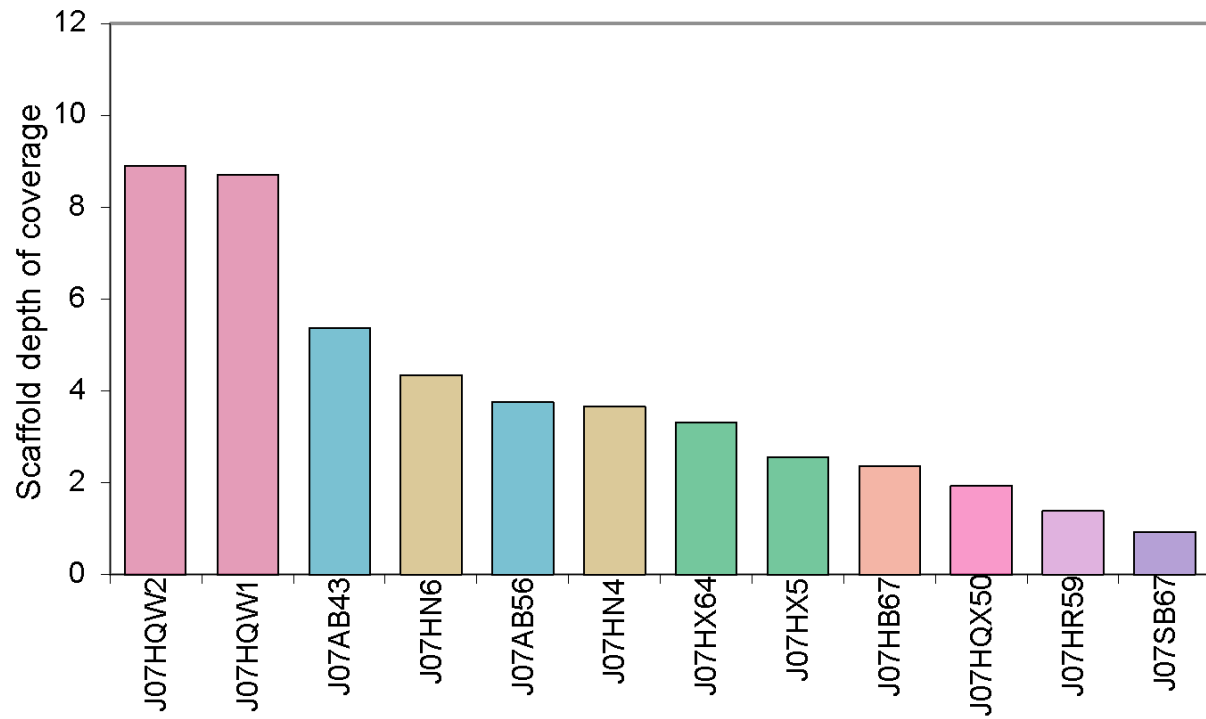

**Supplementary Figure S4.** Rank abundance of assembled microbial populations based on depth of coverage.
