# Supplementary material for: Assembly-Driven Community Genomics of a Hypersaline Microbial Ecosystem
Source: PLOS journal article supplement (doi:10.1371/journal.pone.0061692), 2013-04-18
Supplement: S5 (10.1371/journal.pone.0061692.s005) [file journal.pone.0061692.s005]

**Supporting Table S5.** Distinctive properties of major scaffold clusters. Percentages are based on taxonomic classifications of all predicted protein tophit matches to Genbank nr, as determined using the DarkHorse algorithm at a filter threshold setting of 0.05, including only alignments covering at least 70% of both query and target sequences with an e-value of 1e-5 or better.

| group                            | pct<br>G+C | pct<br>reads<br>0.1 filt | avg<br>read<br>depth | pct Halo-<br>quadrataum | pct Nano-<br>haloarchaea | pct Halo-<br>rabdus | pct Halo-<br>ferax | pct Halo-<br>rubrum | pct Salini-<br>bacter | pct<br>LYS | pct<br>THR | pct<br>ALA | pct<br>GLU |
|----------------------------------|------------|--------------------------|----------------------|-------------------------|--------------------------|---------------------|--------------------|---------------------|-----------------------|------------|------------|------------|------------|
| <b>Haloquadratum</b>             | 48         | 20%                      | 8.6                  | 79%                     | 0%                       | 2%                  | 1%                 | 1%                  | 0%                    | 2.3        | 7.5        | 9.0        | 7.7        |
| <b>HQX50</b>                     | 50         | 20%                      | 2.5                  | 44%                     | 1%                       | 5%                  | 7%                 | 2%                  | 0%                    | 1.4        | 4.3        | 5.6        | 4.8        |
|                                  |            |                          |                      |                         |                          |                     |                    |                     |                       |            |            |            |            |
| <b>Halonotius HN4</b>            | 61         | 59%                      | 3.8                  | 10%                     | 1%                       | 12%                 | 15%                | 12%                 | 0%                    | 1.7        | 6.5        | 10.1       | 7.2        |
| <b>Halonotius HN6</b>            | 63         | 81%                      | 4.6                  | 9%                      | 0%                       | 12%                 | 17%                | 12%                 | 0%                    | 1.7        | 6.2        | 9.9        | 7.2        |
|                                  |            |                          |                      |                         |                          |                     |                    |                     |                       |            |            |            |            |
| <b>Nanosalina<br/>J07AB43</b>    | 43         | 94%                      | 6.4                  | 1%                      | 60%                      | 3%                  | 1%                 | 2%                  | 0%                    | 6.0        | 5.0        | 5.8        | 10.5       |
| <b>Nanosalinarum<br/>J07AB56</b> | 56         | 91%                      | 4.7                  | 1%                      | 53%                      | 4%                  | 0%                 | 1%                  | 0%                    | 4.0        | 5.3        | 7.1        | 10.2       |
|                                  |            |                          |                      |                         |                          |                     |                    |                     |                       |            |            |            |            |
| <b>HX5</b>                       | 60         | 21%                      | 2.9                  | 5%                      | 1%                       | 28%                 | 2%                 | 3%                  | 0%                    | 1.4        | 6.3        | 9.8        | 6.1        |
| <b>HX64</b>                      | 64         | 24%                      | 3.6                  | 5%                      | 1%                       | 27%                 | 3%                 | 4%                  | 0%                    | 1.3        | 6.6        | 9.4        | 7.9        |
|                                  |            |                          |                      |                         |                          |                     |                    |                     |                       |            |            |            |            |
| <b>HB67</b>                      | 67         | 33%                      | 2.9                  | 10%                     | 1%                       | 12%                 | 14%                | 8%                  | 0%                    | 1.3        | 7.5        | 11.4       | 7.7        |
|                                  |            |                          |                      |                         |                          |                     |                    |                     |                       |            |            |            |            |
| <b>Halorubrum</b>                | 60         | 25%                      | 2.4                  | 7%                      | 0%                       | 7%                  | 14%                | 32%                 | 0%                    | 0.9        | 3.1        | 4.9        | 3.7        |
|                                  |            |                          |                      |                         |                          |                     |                    |                     |                       |            |            |            |            |
| <b>Salinibacter</b>              | 66         | 44%                      | 2.2                  | 0%                      | 0%                       | 0%                  | 0%                 | 0%                  | 92%                   | 0.8        | 2.7        | 4.4        | 3.0        |
