# Supplementary material for: Assembly-Driven Community Genomics of a Hypersaline Microbial Ecosystem
Source: PLOS journal article supplement (doi:10.1371/journal.pone.0061692), 2013-04-18
Supplement: S7 (10.1371/journal.pone.0061692.s007) [file journal.pone.0061692.s007]

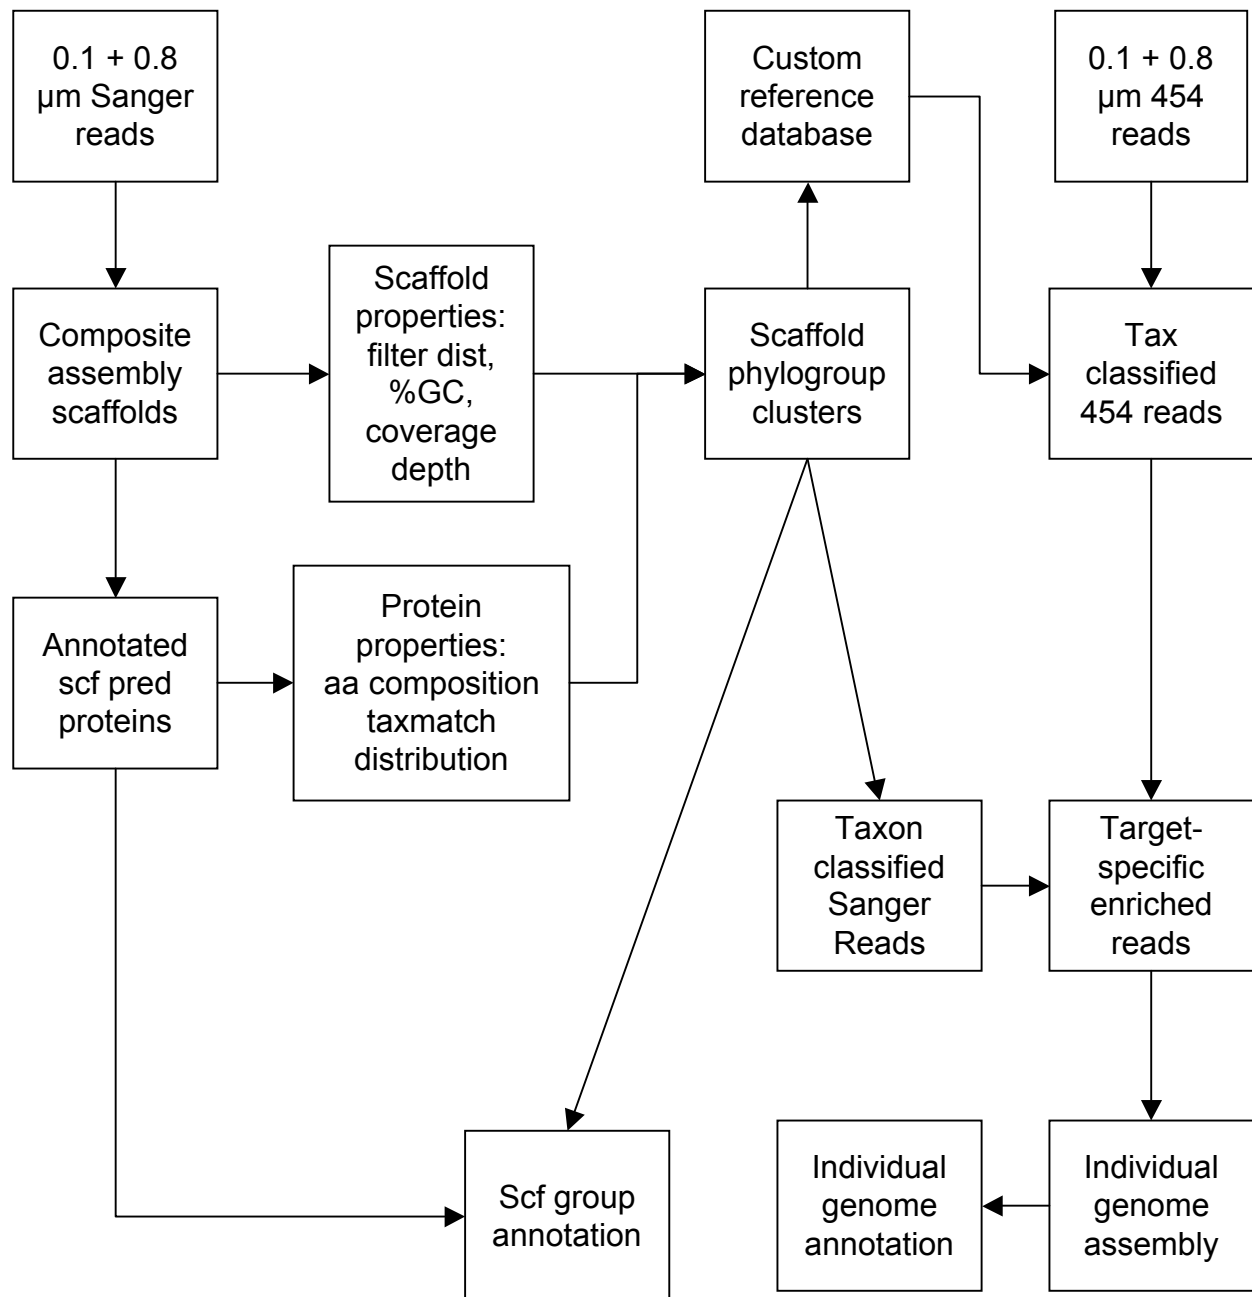

**Supporting Figure S1.** Bioinformatic analysis pipeline.
